# Supplementary material
Source: Springer Nature journal article supplement (https://www.springermedizin.de/resource/supplementary/12913_2009_1315_MOESM1_ESM.pdf/9527844)

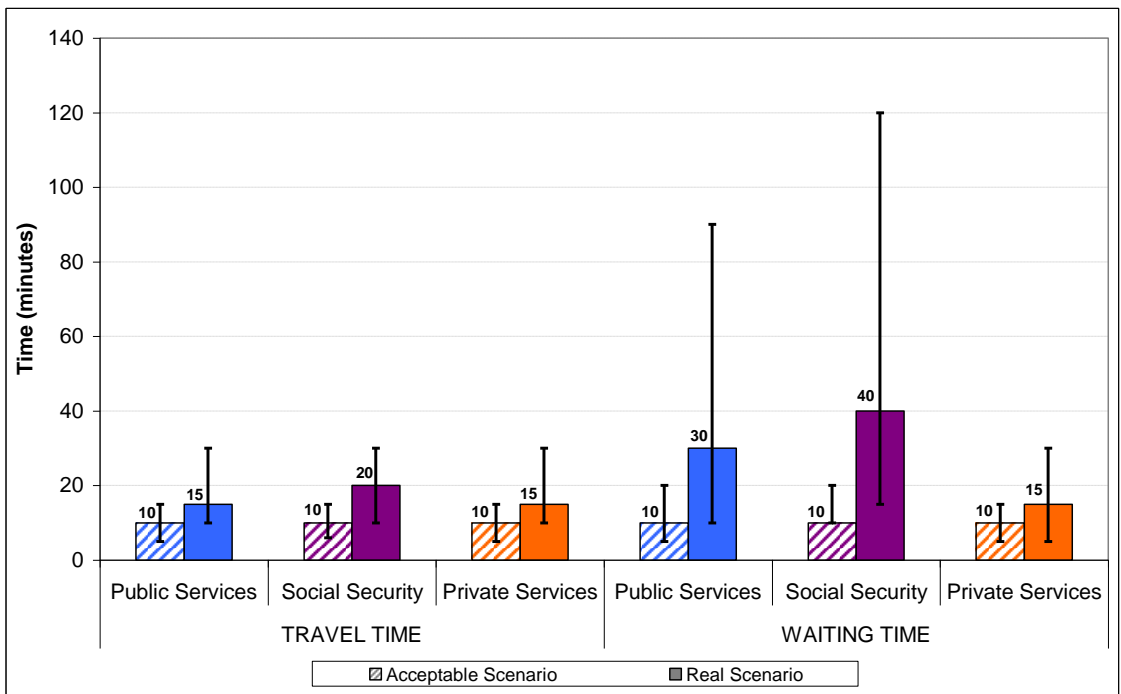

Supplement: MOESM1 [file 9527844]
